# Supplementary material
Source: Royal Society of Chemistry journal article supplement (doi:10.1039/d6nr00300a)
Supplement: d6nr00300a1.pdf [file d6nr00300a1.pdf]

### Supplementary Information

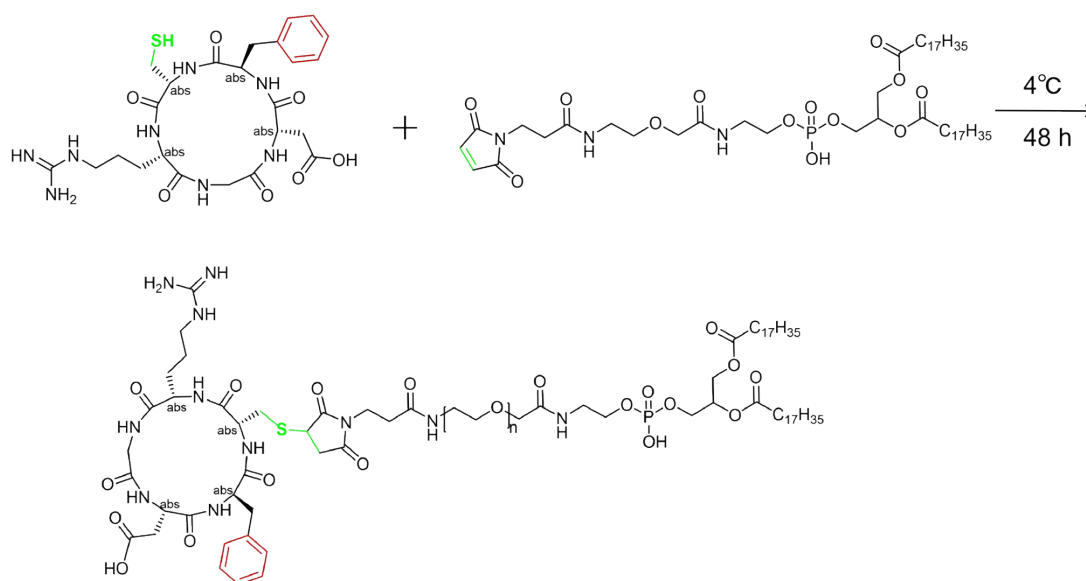

Fig. S1 Synthetic route of DSPE-PEG<sub>2000</sub>-RGD using DSPE-PEG<sub>2000</sub>-Mal and cRGD copolymers in 4°C for two days.

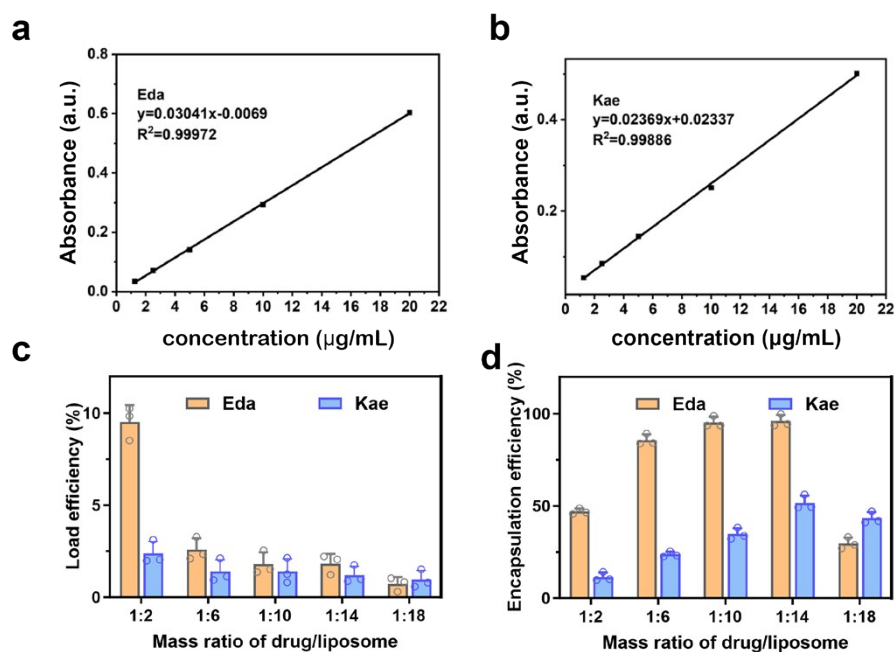

Fig. S2 Loading and encapsulation efficiency of different drug-lipid ratios. (a) Standard curve of edaravone aqueous solution. (b) Standard curve of kaempferol aqueous solution. (c) Drug loading of different drug-lipid ratios. (d) Encapsulation efficiency of different drug-lipid ratios.

Table S1 Cytotoxicity IC<sub>50</sub> values of different naked drugs, drug-loaded liposomes,  
nanoparticles

| µg/mL                  | Eda/Kae | Eda/Kae@Lip | Eda/Kae@Lip-RGD |
|------------------------|---------|-------------|-----------------|
| IC <sub>50</sub> (Eda) | 12.89   | 11.83       | 10.48           |
| IC <sub>50</sub> (Kae) | 14.9    | 14.24       | 12.9            |
